# Supplementary material for: A Star-Shaped Copolymer with Tetra-Hydroxy-Phenylporphyrin Core and Four PNIPAM-b-PMAGA Arms for Targeted Photodynamic Therapy
Source: MDPI journal article supplement (doi:10.3390/polym15030509), 2023-01-18
Supplement: s1 [file s1]

## Supporting Information

# A star-shaped copolymer with porphrin core and four PNIPAM-*b*-PMAGA arms for targeted photodynamic therapy

Changling Liu <sup>1,†</sup>, Yirong Wang <sup>2,†</sup>, Siyu Wang <sup>2</sup>, Pengcheng Xu <sup>2</sup>, Renning Liu <sup>2</sup>, Dandan Han <sup>2,\*</sup> and Yen Wei <sup>3,\*</sup>

<sup>1</sup> School of Materials science and Engineering, Jilin Institute of Chemical Technology, Jilin City 132022, China

<sup>2</sup> College of Biology & Food Engineering, Jilin Institute of Chemical Technology, Jilin City 132022, China

<sup>3</sup> Department of Chemistry and the Tsinghua Center for Frontier Polymer Research, Tsinghua University, Beijing, 100084, China

\* Correspondence: luckhan2006@163.com (D.H.); weiyen@tsinghua.edu.cn (Y.W.)

† These authors contributed equally to this work.

### Preparation and release of paclitaxel-loaded nanoparticles in aqueous solution

The paclitaxel-loaded nanoparticles were prepared by dialysis in aqueous solution. 10 mL distilled water solution of THPP-(PNIPAM-*b*-PMAGA)<sub>4</sub> (8 mg) and paclitaxel (2 mg) was gradually added using a microsyringe at 45 °C until nanoparticles were formed. They prepared nanoparticle solutions were placed in dialysis bags and dialyzed in 1 L of distilled water to remove the solvent, at 6-hour intervals for 24 hours. Finally, the drug-loaded nanoparticle solution was lyophilized, and the drug loading efficiency of paclitaxel in THPP-(PNIPAM-*b*-PMAGA)<sub>4</sub> was determined by high performance liquid chromatography (HPLC). The drug-loaded nanoparticles were immersed in 4mL buffer solution (pH=7.4) and placed in a dialysis membrane bag (MWCO=7000 Da) for dialysis in 26 mL buffer solution. At the set time, 5 mL of drug release solution was extracted and replaced with the same volume of fresh buffer solution and the release of paclitaxel was determined by HPLC.

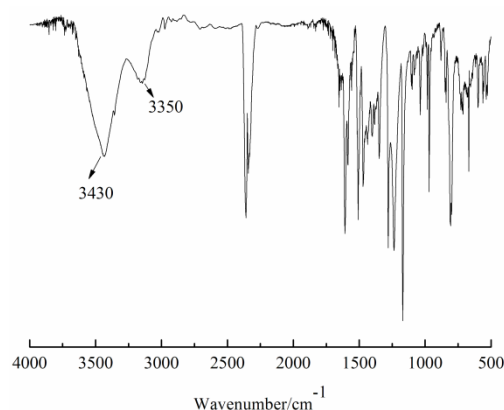

**Figure S1.** FTIR spectra of THPP.

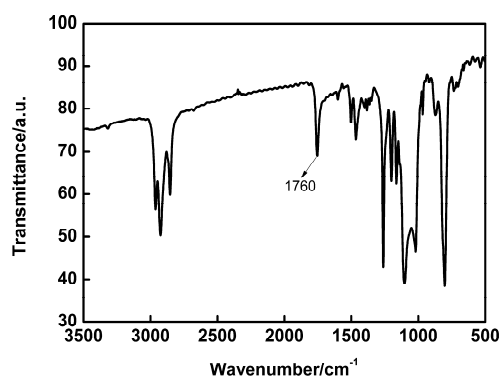

Figure S2. FTIR spectrum of THPP-(DMP)<sub>4</sub>.

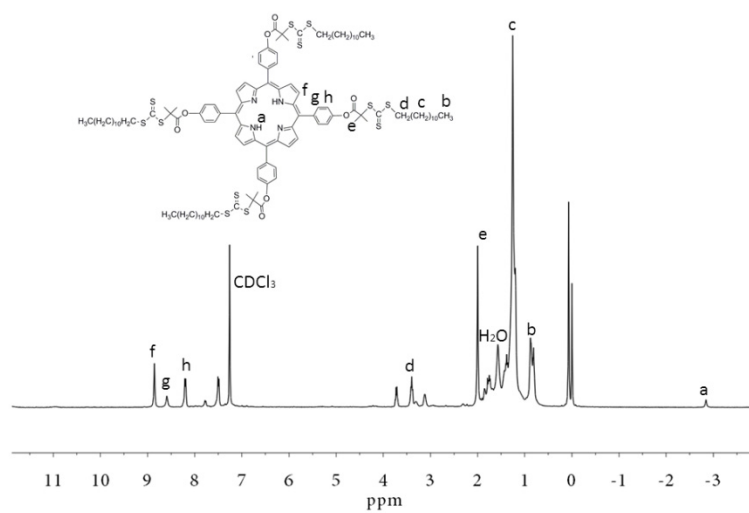

Figure S3. <sup>1</sup>H NMR spectrum of THPP-(DMP)<sub>4</sub>.

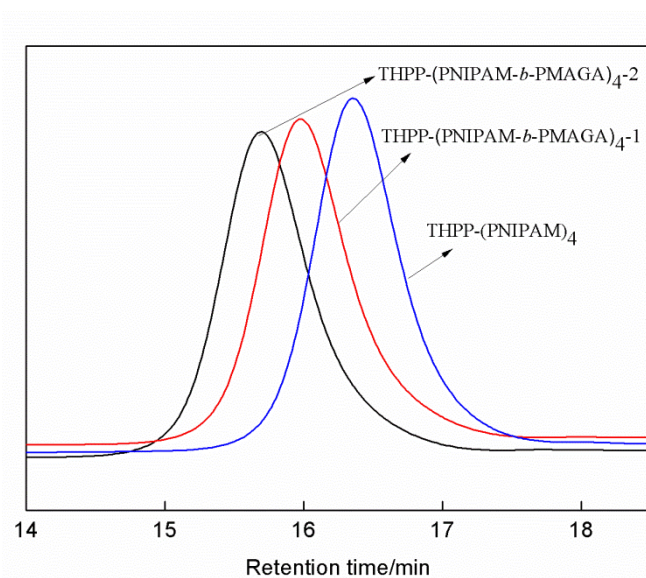

Figure S4. GPC traces of THPP-(PNIPAM)<sub>4</sub> and THPP-(PNIPAM-*b*-PMAGA)<sub>4</sub>.
